# Supplementary material
Source: PubMed Central journal article supplement (PMC196864)
Supplement: pnas_100_19_10682__3.pdf [file pnas_100_19_10682__3.pdf]

TbGPI16 1 - M V V V A A L T F L L C V T T R T Q A L K P T V P R T E R R Y T V H V Q P L T T G L D D D G L E S T L V S L T M T T S  
 HsPIG-T 1 M A A A M P L A T L V L L L L G P G G W C L A E P P R D S L R E E L V I T P L P S G D - - - - - - - - - - - V A A T F

---

TbGPI16 60 L W L P K G S A E D R E E H L S F N E E L D P F W V H V L R R R R F D L I E W S G C G G S W R P E W T S T L H N R K H P  
 HsPIG-T 49 Q F R T R W D S E L Q R E G V S H Y R L F P K A L G Q L I S K Y S L R E L H L S F T Q G F W R T R Y W G - - - - -

TbGPI16 120 V D K S T A E L I H D L S H H S V C S Q S T L S A C G W V S T S S N G N N D G N A T S A G E E D L R H H H Q W L A Q F V  
 HsPIG-T 101 - - - - - - - - - - - P P F L Q A P S G A E L W V W F Q D T - - - - - - - - - - V T D V D K S W K E L S N V L

TbGPI16 180 S S L L S S P L T W W D D T P R F V R P I G A L H S V P A G N S V F A S S G Y S G K F G D V R W C S Y H H A Q Q D T L C  
 HsPIG-T 135 S G I F C A S L N F I D S T N - T V T P T A S F K P L G L A N - - - - - - - - - - D T D H Y F L R Y A V L P R E V V C

TbGPI16 240 T Q H V T A L L N G R S G K D V E E R I P R G I F R A G L V S M E D F F S S V F H H F R F E V K Q S P A T E G G E A R  
 HsPIG-T 183 T E N L T P W K K L L P C S S K A G L S V - - - - - - - - - - L L K A D R L F H T S Y H S Q A V H I R - - P V C R N A R C T

TbGPI16 300 G N H T N E E A E I K L V M R M A F V E Q N K K F D A L S S H W K E S F P E Y A P S V D F I T G S Q L N A K L S S A L Q  
 HsPIG-T 233 S I S W E L R Q T L S V V F D A F I T G Q G K K D W S L F R M F S R T L T E P C P - - - L A S E S R V Y V D I T T Y N Q

TbGPI16 360 T L K K P Q G A R S G N D N Q A L G N V E V T P T A Q H F I S A V G Y D R G T Y R L V V N P T P E V P T S G N S N T K S  
 HsPIG-T 290 - - - - - - - - - - D N E T L E V H P P P T T T Y Q D V I L G T R K T Y A I Y D L D L D T A M I N N S R N L N I Q L K W

TbGPI16 420 R H E Q S L M L Q P G D T L E A L L F F P - L H L M R P S L H E M R A G A G L E S R V E N A F V D E S A N V L V V L V H  
 HsPIG-T 339 K R P P E N E A P P V P F L H A Q R Y V S G Y G L Q K G E L S T L L Y N T H P Y R A F P V L L L D T V P W Y L R L Y V H

TbGPI16 479 T - T V T E T A M R P L E A G V Q S N G F V L C E F P F R F G W S A N K D M P P D A N S N R I L P Q P V I R V G R H V S  
 HsPIG-T 399 T L T I T S K G K E N K P S Y I H Y Q P A Q D R L Q P H L L E M L I Q L P A N S V T K V S I Q F E R A L L K W T E Y T P

---

TbGPI16 538 S A G G K V G E G D K A S G A Q N C G M S R C A S I S N K R I D H Q G S L E S L M E S M R R D N N R K G P C V C Y F W L  
 HsPIG-T 459 D P N H G F Y V S P S V L S A L V P S M V A A K P V D W E E S P L F N S L F P V S D G S N - - - - - - - - - - - Y F V R

TbGPI16 598 R C S N V A G S T L P V P D P A M V F N V V T L G L I F S A I V A G G V V R S T K R L F D V E E S G A D D E N P L I I R  
 HsPIG-T 508 L Y T E P L L V N L P T P D F S M P Y N V I C L T C T V V A V C Y G S F Y N L L T R T F H I E E P R T G G - - - - -

---

TbGPI16 658 I I L R I M K R L R K R R A A A A G T G  
 HsPIG-T 561 L A K R L A N L I R R A R G V P P L - -
