# Supplementary material
Source: PubMed Central journal article supplement (PMC196864)

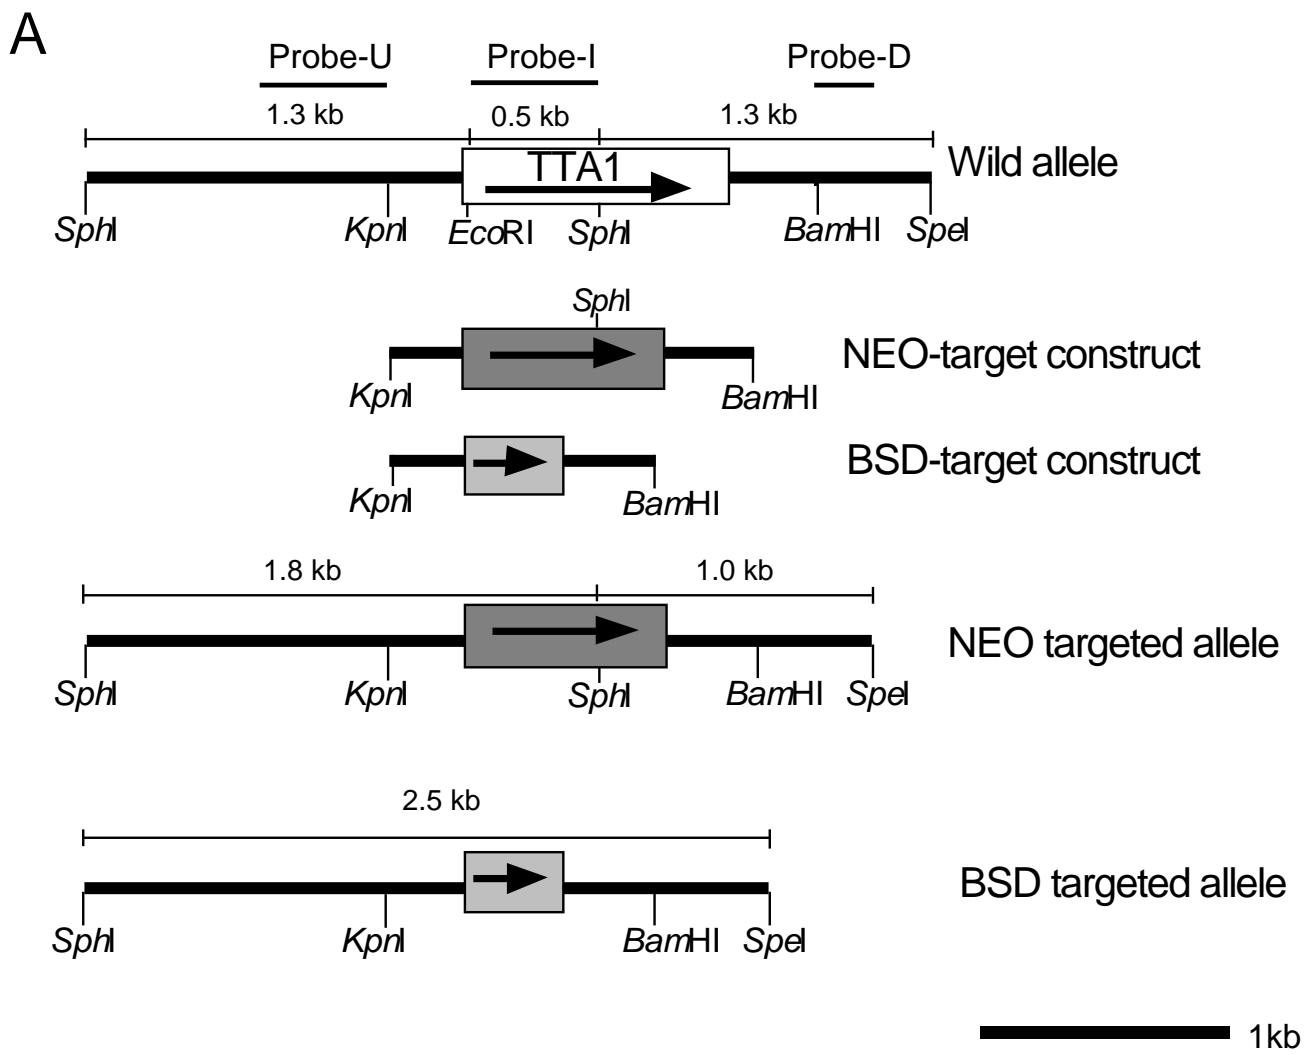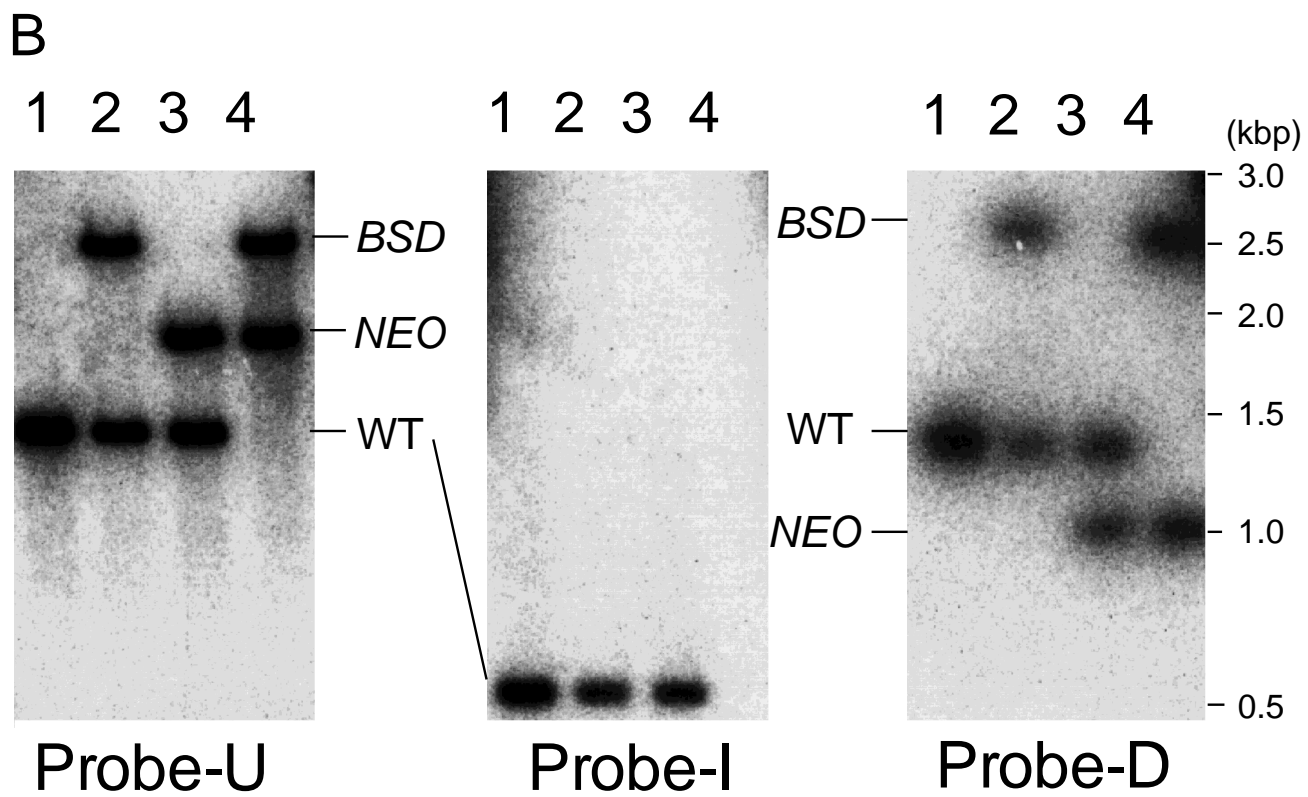

Supplement: pnas_100_19_10682__5.pdf [file pnas_100_19_10682__5.pdf]
